# Supplementary material
Source: MDPI journal article supplement (https://www.mdpi.com/2073-4441/13/17/2363)
Supplement: s1 [file s1]

**Table S1:** Catchment characteristics of unmanaged and managed boreal catchments used in the study.

| Catchment        | Managed | Area<br>(ha) | Waterbodies<br>(%) | Arable<br>(%) | Drainage<br>(m ha <sup>-1</sup> ) | Rich <sub>p</sub> | Poor <sub>rm</sub> | Peatland<br>(%) | Fertilization* | Scots<br>pine<br>(%) | Norway<br>spruce<br>(%) | Deciduous<br>trees (%) | Tvol<br>(m <sup>3</sup><br>ha <sup>-1</sup> ) | av.<br>runoff<br>(mm) | Temp<br>(°C,<br>1980-<br>2010) | Prec<br>(mm,<br>mean) |
|------------------|---------|--------------|--------------------|---------------|-----------------------------------|-------------------|--------------------|-----------------|----------------|----------------------|-------------------------|------------------------|-----------------------------------------------|-----------------------|--------------------------------|-----------------------|
| Rudbäcken        | 1       | 436          | 0.0                | 4.9           | 41.7                              | 0.007             | 0.006              | 5.6             | -              | 36                   | 39                      | 25                     | 148                                           | 334                   | 1454                           | 661                   |
| Rantainrahka     | 1       | 36.5         | 0.0                | 0             | 87.7                              | 0                 | 0.063              | 8.0             | -              | 32                   | 57                      | 11                     | 145                                           | 215                   | 1439                           | 583                   |
| Ojakorpi         | 1       | 30.9         | 0.0                | 0             | 133.4                             | 0                 | 0.035              | 5.2             | -              | 8                    | 76                      | 16                     | 137                                           | 228                   | 1425                           | 574                   |
| Kroopinsuo       | 1       | 179.1        | 0.0                | 0             | 118.7                             | 0.016             | 0.117              | 27.5            | -              | 10                   | 77                      | 13                     | 143                                           | 253                   | 1404                           | 558                   |
| Huhtisuonoja     | 1       | 505.4        | 0.0                | 0             | 128                               | 0.02              | 0.003              | 44.4            | -              | 20                   | 69                      | 11                     | 152                                           | 202                   | 1366                           | 646                   |
| Paunulanpuro     | 1       | 153.8        | 0.0                | 0             | 58.8                              | 0.009             | 0.004              | 13.2            | -              | 43                   | 36                      | 21                     | 165                                           | 220                   | 1283                           | 606                   |
| Katajaluoma      | 1       | 1455.4       | 0.0                | 3.3           | 130                               | 0.003             | 0.109              | 36.2            | -              | 18                   | 69                      | 13                     | 108                                           | 216                   | 1287                           | 667                   |
| Pakopirtti       | 1       | 801.1        | 0.0                | 0             | 140.2                             | 0.002             | 0.011              | 67.3            | -              | 29                   | 56                      | 15                     | 66                                            | 186                   | 1219                           | 552                   |
| Surnui           | 1       | 70.7         | 0.0                | 0             | 139.4                             | 0.036             | 0                  | 36.5            | -              | 21                   | 62                      | 17                     | 108                                           | 223                   | 1250                           | 599                   |
| Kesselinpuro     | 1       | 1966.3       | 0.8                | 1             | 109.5                             | 0.032             | 0.006              | 41.2            | -              | 35                   | 48                      | 17                     | 140                                           | 252                   | 1275                           | 665                   |
| Kohisevanpuro    | 1       | 1072.3       | 0.2                | 1.3           | 57.3                              | 0.024             | 0                  | 25.6            | -              | 19                   | 59                      | 22                     | 142                                           | 272                   | 1261                           | 626                   |
| Pahkaoja         | 1       | 2344         | 1.0                | 1.8           | 97.8                              | 0.003             | 0.027              | 46.6            | -              | 10                   | 75                      | 15                     | 66                                            | 293                   | 1128                           | 587                   |
| Korpijoki        | 1       | 12148.8      | 0.2                | 11.6          | 132.1                             | 0.022             | 0.002              | 35.3            | -              | 22                   | 50                      | 28                     | 104                                           | 339                   | 1154                           | 623                   |
| Liuhapuro        | 1       | 166.7        | 0.0                | 0             | 7.2                               | 0.028             | 0.001              | 57.6            | -              | 41                   | 44                      | 15                     | 156                                           | 405                   | 1118                           | 674                   |
| Kivipuro         | 1       | 50.6         | 0.0                | 0             | 16.1                              | 0.009             | 0                  | 34.1            | 13.2           | 27                   | 55                      | 18                     | 130                                           | 377                   | 1118                           | 674                   |
| Myllypuro        | 1       | 1053.3       | 0.6                | 0.4           | 80.6                              | 0.02              | 0.005              | 31.8            | 3.8            | 18                   | 62                      | 20                     | 96                                            | 455                   | 1043                           | 807                   |
| Vääräjoki        | 1       | 1782.7       | 1.1                | 0.1           | 26                                | 0.01              | 0.006              | 43.1            | -              | 20                   | 65                      | 15                     | 56                                            | 317                   | 863                            | 687                   |
| Kotioja          | 1       | 1718.7       | 0.2                | 1.4           | 91.8                              | 0.039             | 0.002              | 50.4            | -              | 12                   | 67                      | 21                     | 51                                            | 456                   | 968                            | 623                   |
| Vähä-Askanjoki   | 1       | 1560.4       | 0.1                | 0             | 29.2                              | 0.019             | 0.001              | 26.2            | -              | 10                   | 81                      | 9                      | 61                                            | 452                   | 942                            | 600                   |
| Laanioja         | 1       | 1373.4       | 0.1                | 0.2           | 12.5                              | 0.016             | 0.17               | 5.1             | -              | 0                    | 93                      | 7                      | 25                                            | 503                   | 942                            | 600                   |
| Hauklammenoja    | 0       | 136.6        | 6.0                | 0.1           | 19.1                              | 0.004             | 0.002              | 4.5             | -              | 37                   | 38                      | 25                     | 174                                           | 386                   | 1454                           | 661                   |
| Susimäki         | 0       | 6.6          | 0.0                | 0             | 0                                 | 0.04              | 0                  | 23.3            | -              | 68                   | 23                      | 9                      | 254                                           | 406                   | 1202                           | 630                   |
| Helvetinjärvi    | 0       | 12.1         | 0.0                | 0             | 0                                 | 0                 | 0.018              | 38.5            | -              | 15                   | 77                      | 8                      | 84                                            | 339                   | 1200                           | 607                   |
| Mustospuro       | 0       | 324.8        | 1.0                | 0.3           | 6.2                               | 0.013             | 0.005              | 44.3            | -              | 22                   | 71                      | 7                      | 128                                           | 249                   | 1218                           | 587                   |
| Kelopuro         | 0       | 74.1         | 4.7                | 0             | 2.6                               | 0                 | 0.021              | 47.7            | -              | 6                    | 88                      | 6                      | 88                                            | 366                   | 1145                           | 668                   |
| Porkkasalonpuro  | 0       | 71.6         | 0.0                | 0             | 18.4                              | 0.019             | 0.009              | 18.6            | -              | 35                   | 52                      | 13                     | 166                                           | 439                   | 1106                           | 731                   |
| Syöte            | 0       | 74.9         | 0.0                | 0             | 2.9                               | 0.004             | 0                  | 30.9            | -              | 29                   | 48                      | 23                     | 62                                            | 339                   | 898                            | 731                   |
| Oijusluoma       | 0       | 48.6         | 0.0                | 0             | 9.5                               | 0.009             | 0.001              | 37.0            | -              | 26                   | 60                      | 14                     | 74                                            | 289                   | 878                            | 697                   |
| Lompolojängänoja | 0       | 514.2        | 0.0                | 0             | 20.4                              | 0.035             | 0.002              | 21.1            | -              | 30                   | 52                      | 18                     | 294                                           | 276                   | 716                            | 686                   |
| Iittovuoma       | 0       | 1171.2       | 1.5                | 0             | 9.2                               | 0                 | 0                  | 12.0            | -              | 0                    | 0                       | 100                    | 2                                             | 493                   | 531                            | 528                   |

\*cumulative % of catchment area

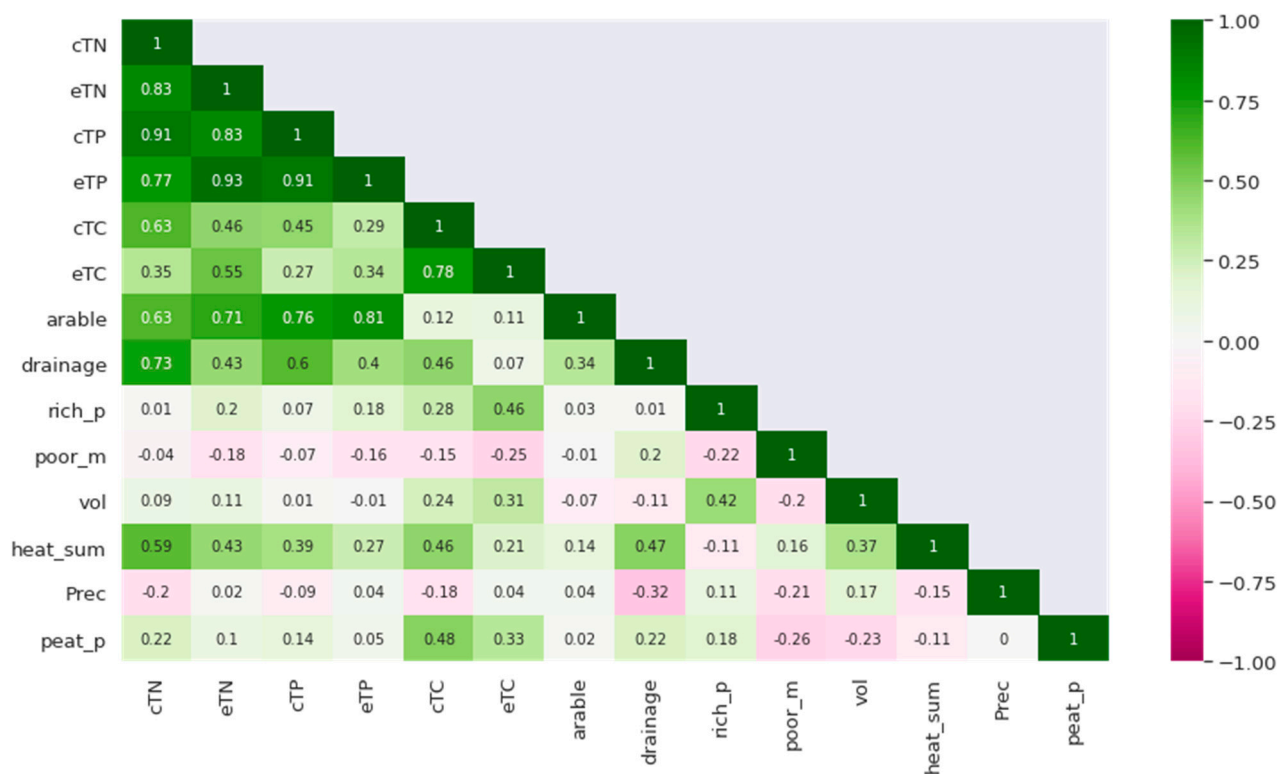

**Figure S1** The correlations of fixed factors used in the models. Here e denotes export of the nutrient in question, c means the concentration, Prec is the precipitation, rich\_p ratio of rich fertility pealands in catchment, poor\_m ratio of poor mineral soils, vol is tree volume, drainage is drainage intensity and heat\_sum is the long term temperature sum.

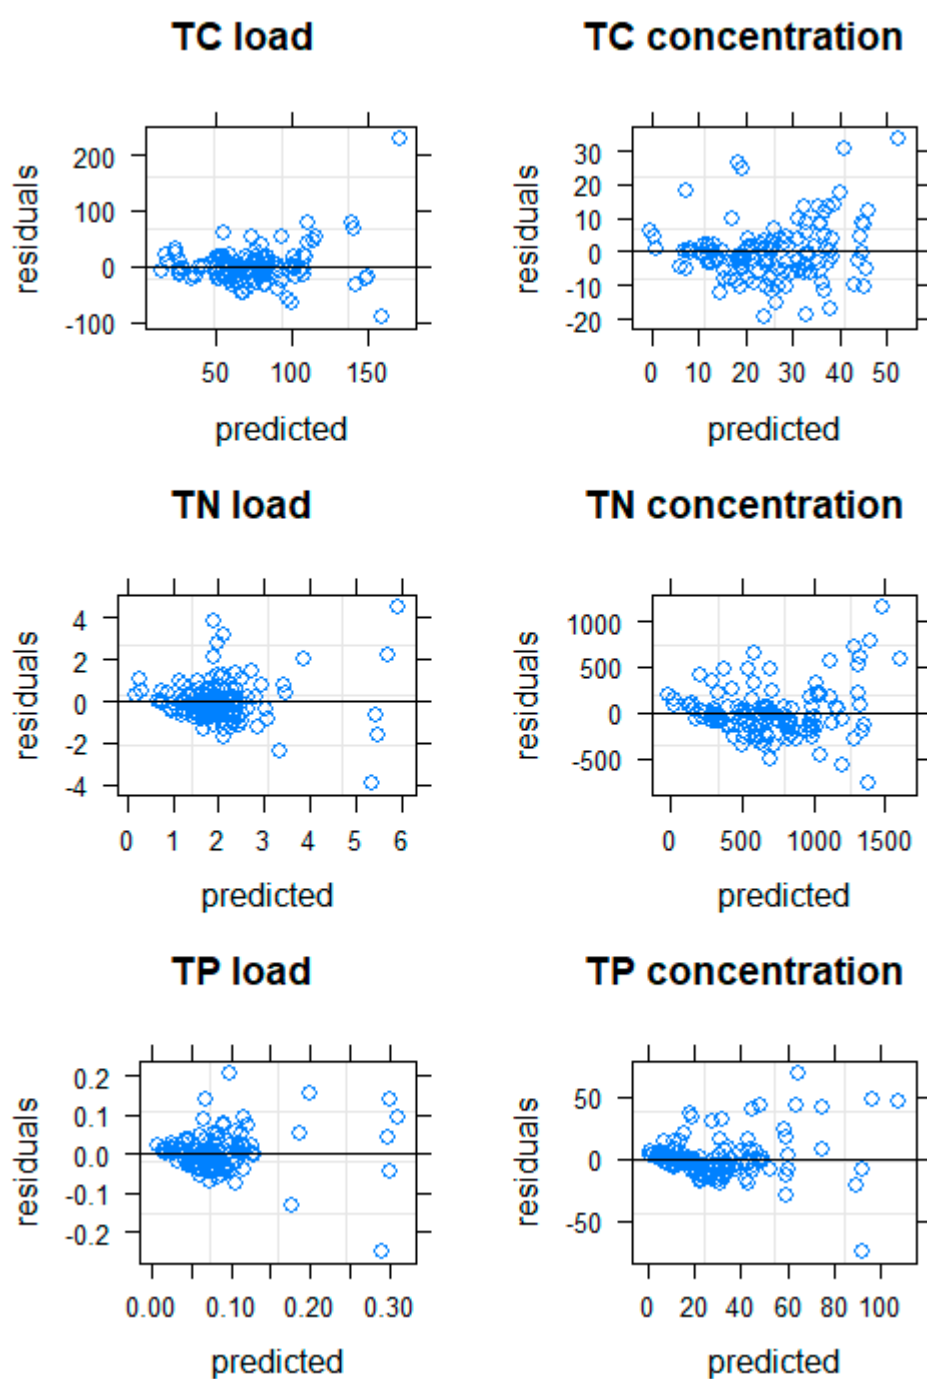

Figure S2: Residual plots of final models.
